# Supplementary material for: RIPpore: A Novel Host-Derived Method for the Identification of Ricin Intoxication through Oxford Nanopore Direct RNA Sequencing
Source: MDPI journal article supplement (doi:10.3390/toxins14070470), 2022-07-09
Supplement: s1 [file s1]

# Supplementary Materials: RIPpore: a Novel Host-Derived Method for the Identification of Ricin Intoxication through Oxford Nanopore Direct RNA Sequencing

Yan Ryan, Abbie Harrison, Hannah Trivett, Catherine Hartley, Jonathan David, Graeme C. Clark and Julian A. Hiscox

**Table S1.** Overview of Flow cell and direct RNA reads.

| Flow cell     | Total Reads | Samples Loaded |
|---------------|-------------|----------------|
| Control 1     | 441184      | 1              |
| Control 2     | 79569       | 1              |
| Control 3     | 14500       | 1              |
| B-chain       | 296000      | 4              |
| Ricin Cell 1  | 91437       | 3              |
| Ricin Cell 2  | 556362      | 4              |
| Ricin Cell 3  | 651134      | 4              |
| Poreplex Cell | 192358      | 4              |
| Saporin Cell  | 308952      | 4              |

**Scheme S1.** Flow cells show a range of 15,000 to 600,000 reads, with no discernible effect from barcoding on final number of reads.

Table S2. Overview of Sample Reads per sample and reads at RIP depurination site.

| Sample                | Total Reads Per Sample | Reads at Adenine 4605 | Percentage Reads 28S | Barcoding     |
|-----------------------|------------------------|-----------------------|----------------------|---------------|
| Control 1             | 441184                 | 324033                | 73.4                 | Single Sample |
| Control 2             | 79569                  | 51190                 | 64.3                 | Single Sample |
| Control 3             | 14500                  | 10901                 | 75.2                 | Singe Sample  |
| Five Hour Ricin       | 449858                 | 298160                | 66.3                 | Single Sample |
| B-chain 1             | 26477                  | 16598                 | 62.7                 | DeePlexiCon   |
| B-chain 2             | 89836                  | 66066                 | 73.5                 | DeePlexiCon   |
| B-chain 3             | 60390                  | 33288                 | 55.1                 | DeePlexiCon   |
| B-chain 4             | 96088                  | 72406                 | 75.4                 | DeePlexiCon   |
| Ricin Cell 1 2 Hours  | 21977                  | 9913                  | 45.1                 | DeePlexiCon   |
| Ricin Cell 1 4 Hours  | 45016                  | 27943                 | 62.1                 | DeePlexiCon   |
| Ricin Cell 1 6 Hours  | 13501                  | 6286                  | 46.6                 | DeePlexiCon   |
| Ricin 24 Hours        | 17108                  | 4939                  | 28.9                 | Poreplex      |
| Poreplex              | 39688                  | 5433                  | 13.7                 | DeePlexiCon   |
| Saporin 1             | 114318                 | 22022                 | 19.3                 | DeePlexiCon   |
| Saporin 2             | 30410                  | 4669                  | 15.4                 | DeePlexiCon   |
| Saporin 3             | 106322                 | 27482                 | 25.8                 | DeePlexiCon   |
| Saporin 4             | 116094                 | 27839                 | 24.0                 | DeePlexiCon   |
| Ricin Cell 2 2 Hours  | 248554                 | 77606                 | 31.2                 | DeePlexiCon   |
| Ricin Cell 2 4 Hours  | 94460                  | 21372                 | 22.6                 | DeePlexiCon   |
| Ricin Cell 2 24 Hours | 64504                  | 14745                 | 22.9                 | DeePlexiCon   |
| Ricin Cell 3 2 Hours  | 103890                 | 21716                 | 20.9                 | DeePlexiCon   |
| Ricin Cell 3 4 Hours  | 269886                 | 79390                 | 29.4                 | DeePlexiCon   |
| Ricin Cell 3 6 Hours  | 115988                 | 26668                 | 23.0                 | DeePlexiCon   |
| Ricin Cell 3 24 Hours | 123780                 | 26035                 | 21.0                 | DeePlexiCon   |

Table S2. Samples show generally the same order of magnitude of reads with two saporin samples, and one ricin sample in flow cells 2 and 3 being an order of magnitude lower than the remaining reads. The efficiency of the custom barcode ligation to 28S ribosomal reads has a high variance between 15 and 75% but an average of 41% as seen by percentage Reads 28S. .

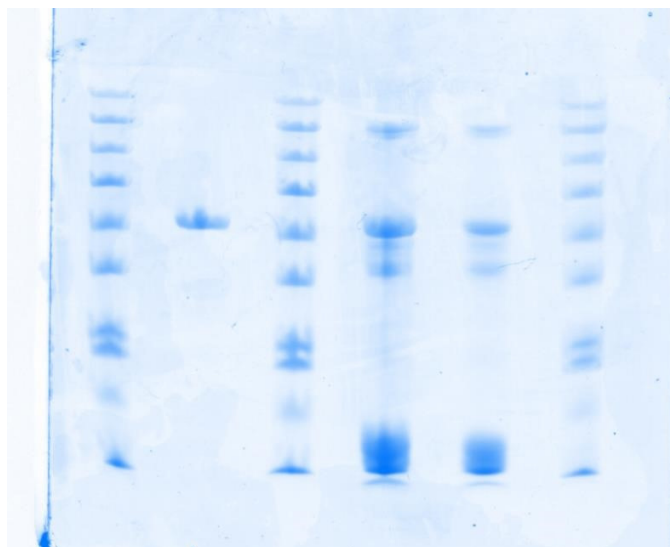

**Figure S1.** Unedited image of Fig. 2(A) in original orientation. Shows Coomassie blue analysis of crude (right) and purified (left) ricin toxin preparations alongside protein ladders (10-180 kDa).

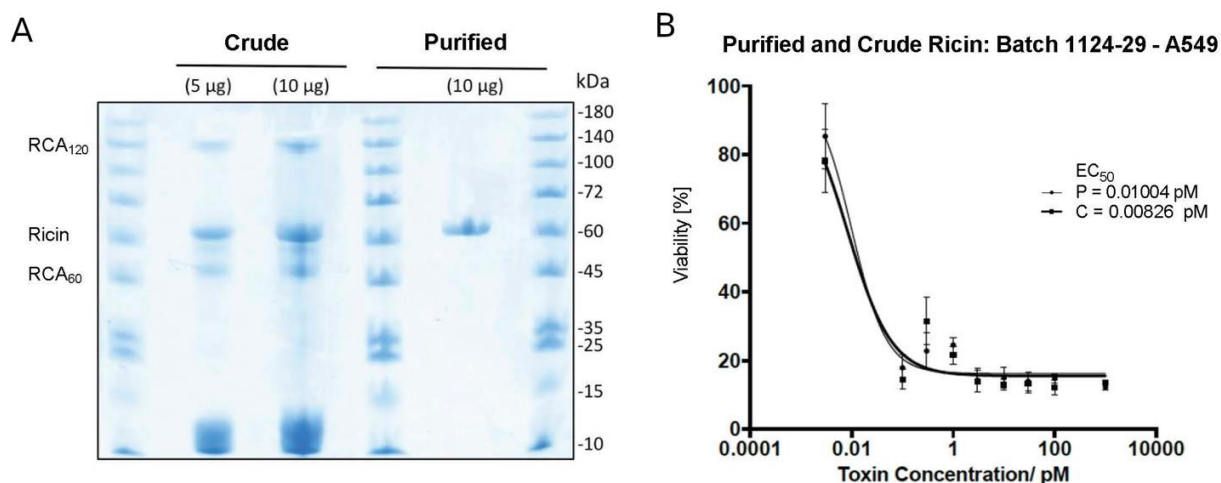

**Figure S2.** (A). Coomassie blue analysis of crude and purified ricin toxin preparations. Two different amounts of the crude preparation were evaluated (5  $\mu$ g and 10  $\mu$ g) and a single preparation of the purified fraction (10  $\mu$ g). Molecular weight markers are indicated to the right and the expected size of purified ricin and the *R. communis* agglutinins (RCA120 and RCA60) are indicated to the left. (B). WST-1 viability assay on A549 cells exposed to increasing concentrations of crude (C) and purified (P) ricin toxin for 48 hours showed a plateau in toxicity beginning at 10 pM and a difference in EC<sub>50</sub> of 2 fM.

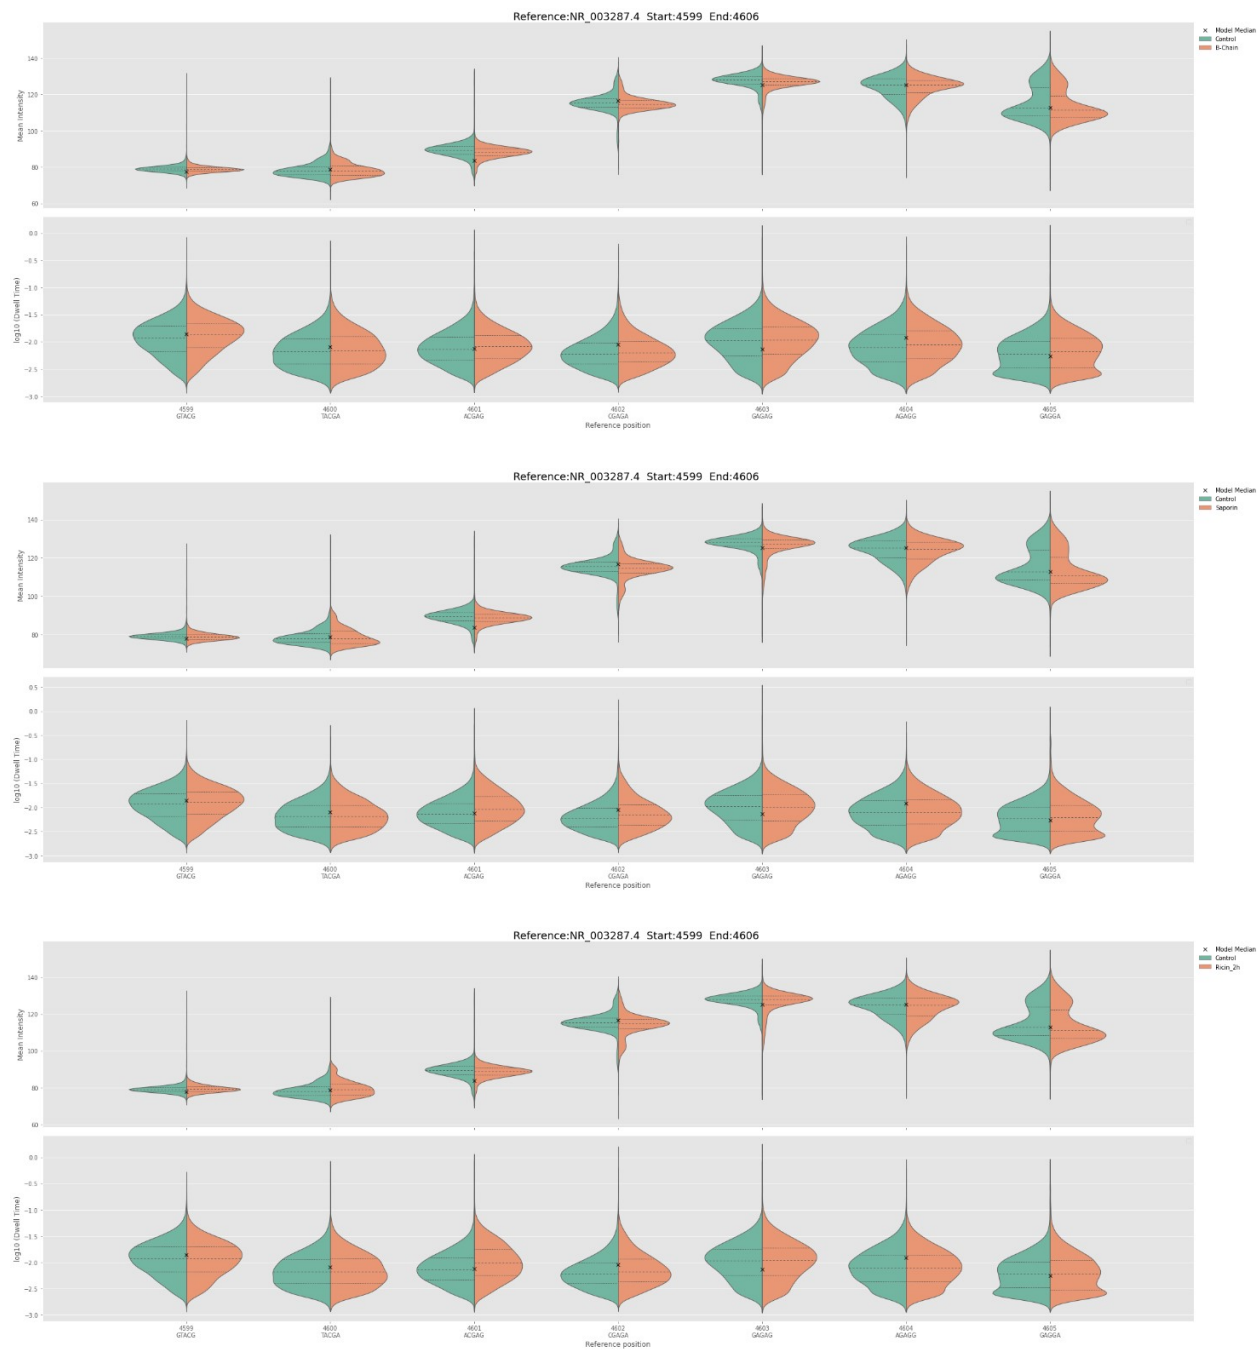

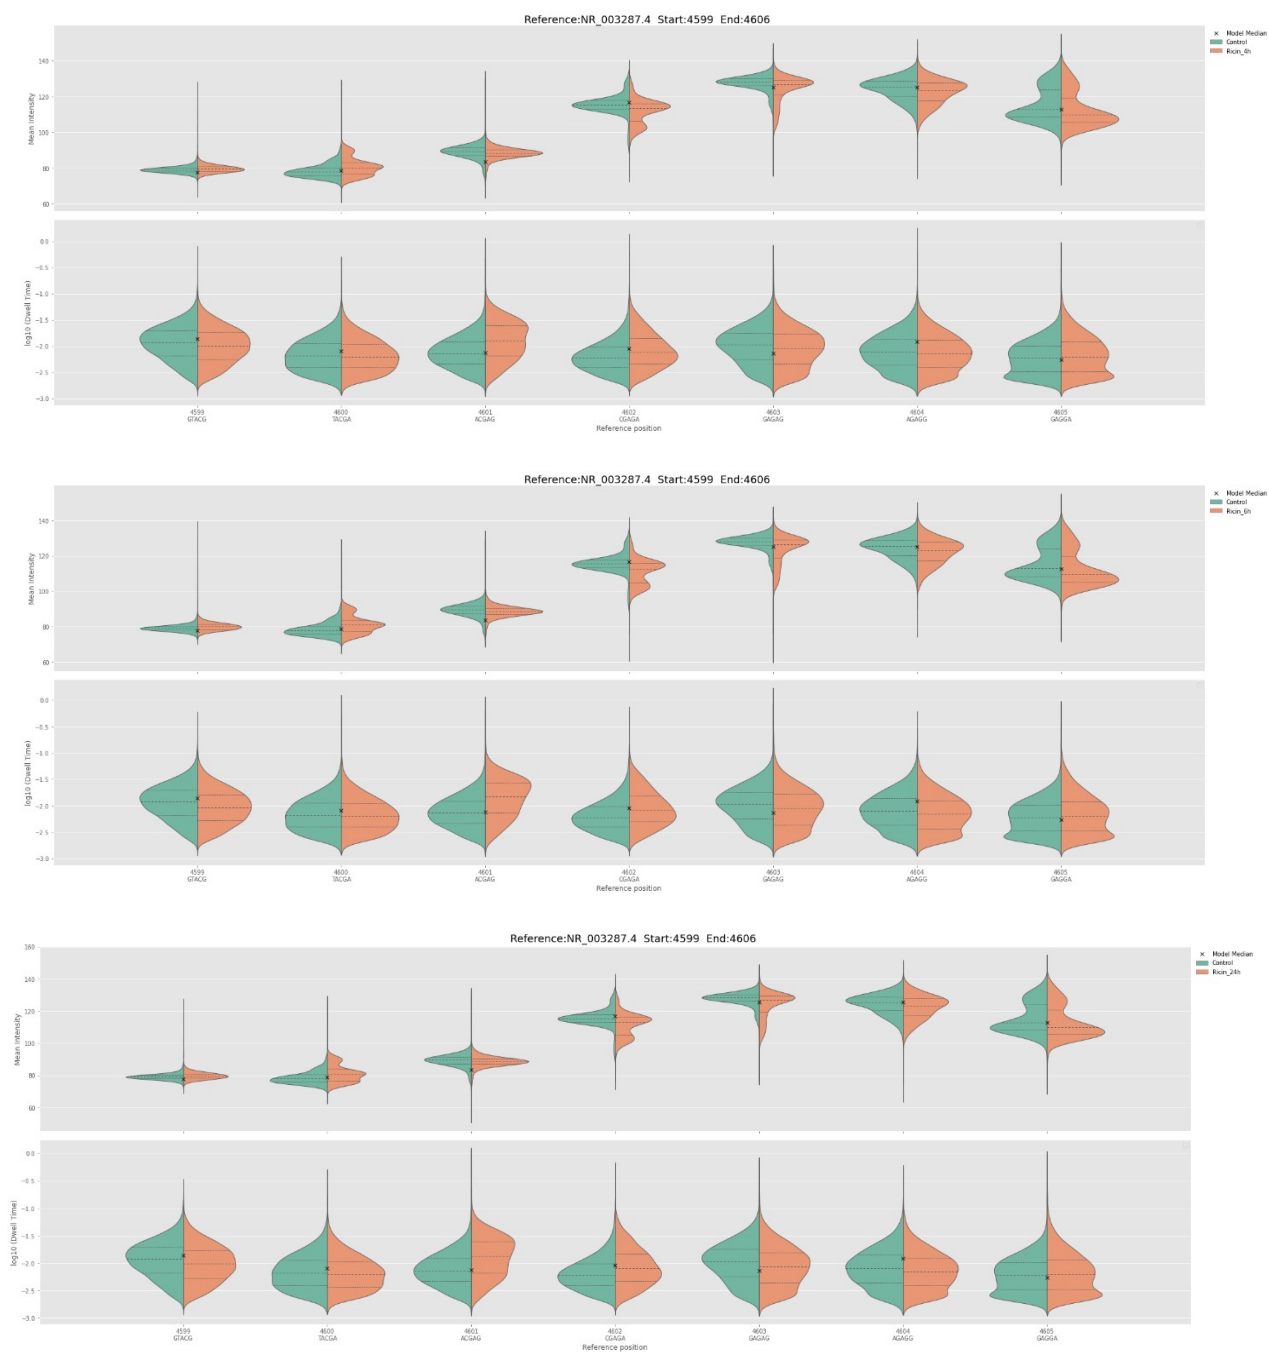

**Figure S3.** Fig. 5 Extended to All Conditions.

Figure S3. shows time dependence of the effects on charge density and dwell time, with saporin and earlier timepoints showing more similarity to control reads, and later ricin exposed time points showing greater changes. .

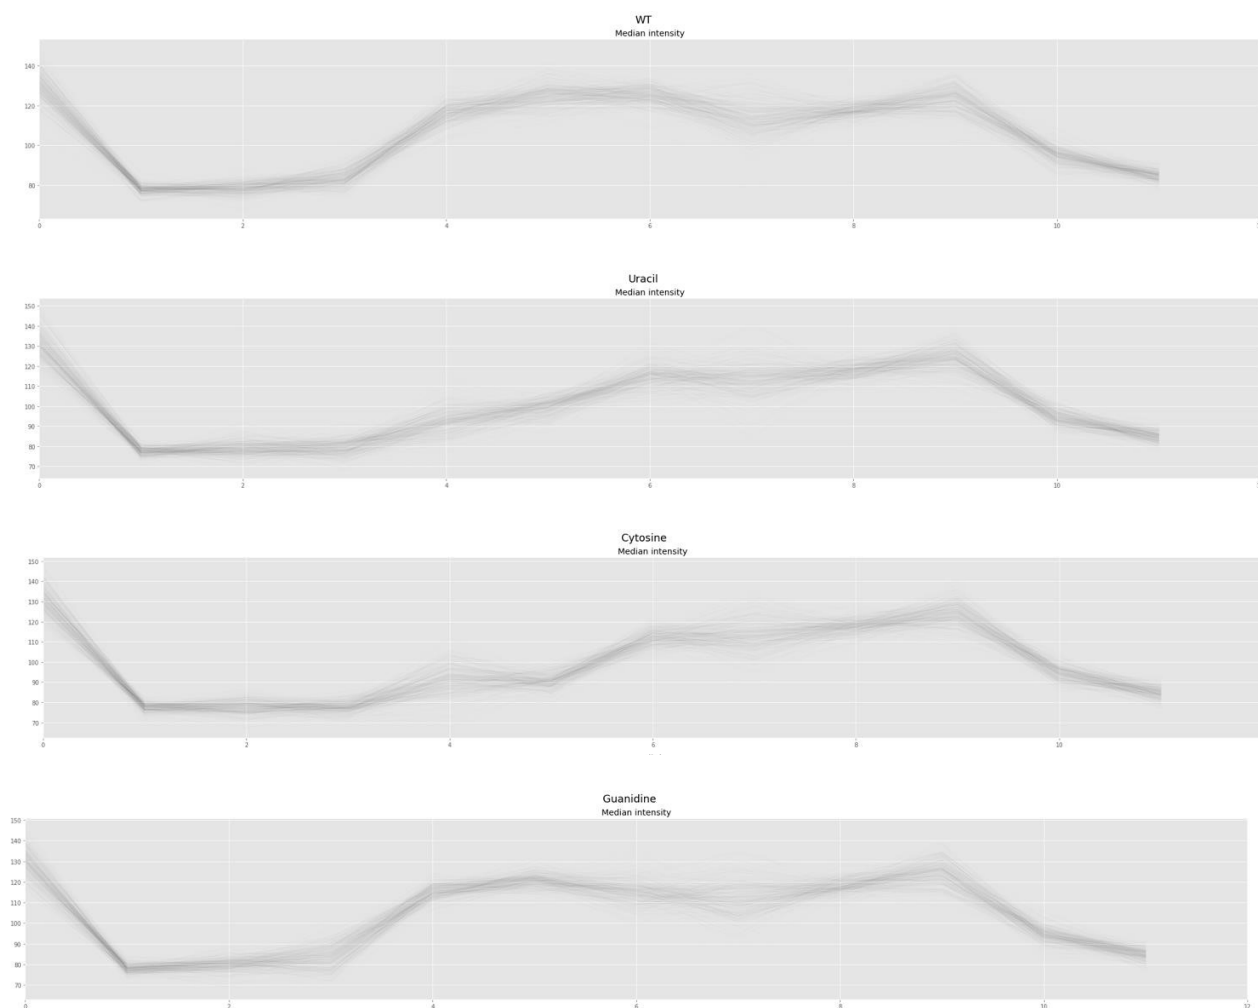

**Figure S4.** Fig. 6 extended with all four nucleotides.

Figure S4. shows Nanopore simulated charge intensities for reads with all four bases at base 4605. Cytosine has a decrease in charge similar to uracil but plateaus between positions 4 and 5, whereas uracil continues decreasing. Guanidine appears similar to adenine, but at position 5 peaks at around 120 charge intensity, whereas adenine peaks nearer 130.

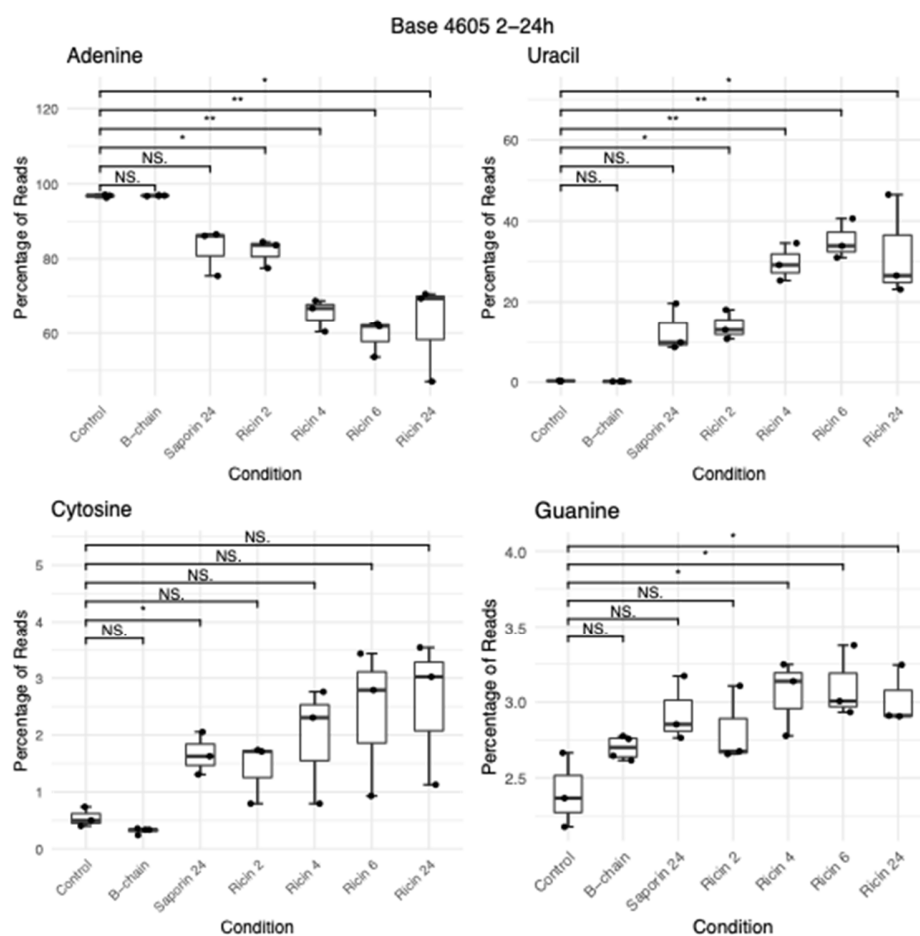

**Figure S5.** Boxplots showing a time course (2 – 24 h) of the percentage of nucleotide composition at position A4605 in 28S rRNA from A549 cells following exposure to vehicle control, ricin B-chain, saporin or pure ricin. either control, B-chain (6 h), or saporin at 24 h or ricin at 2, 4, 6 and 24 h post-exposure. Pairwise t-tests assessing control to each exposure were used to perform significance testing.

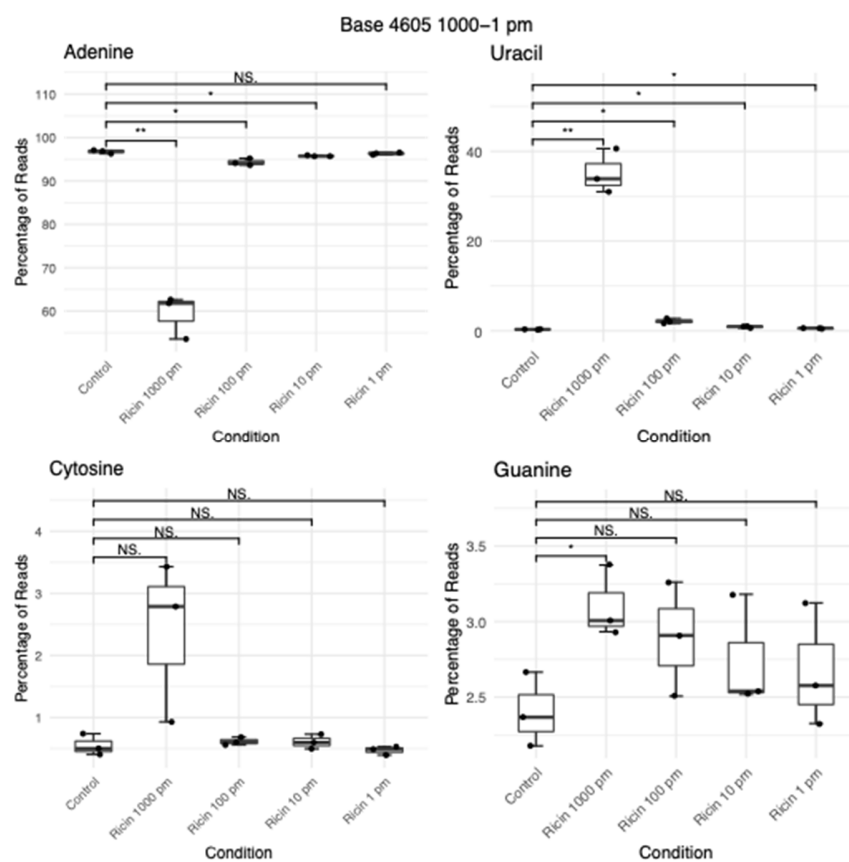

**Figure S6.** Boxplots showing percentage of nucleotide composition at position A4605 in 28S rRNA from A549 cells exposed to differing concentrations of ricin (1 – 1000 pm; 6 h). Pairwise t-tests assessing control to each exposure were used to perform significance testing.



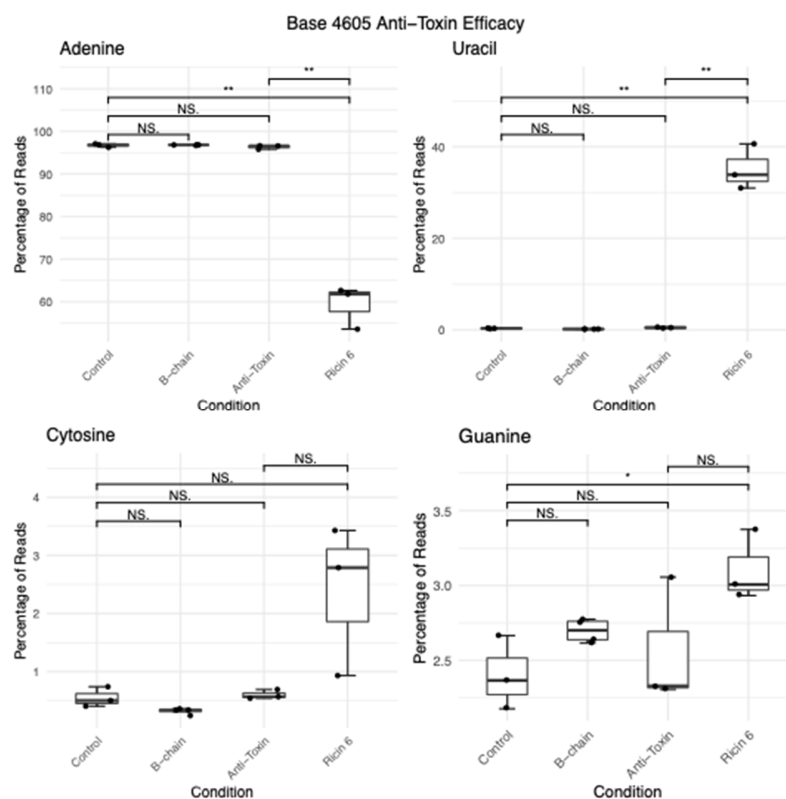

**Figure S7.** Boxplots showing the percentage of nucleotide composition at position A4605 in 28S rRNA from A549 cells following exposure to vehicle control, ricin B-chain (1nm, 6h), ricin (1nm, 6h), ricin and antitoxin (1nm ricin, neutralising dose antitoxin, 6h). Pairwise t-tests assessing control to each exposure were used to perform significance testing additionally with ricin and, antitoxin against ricin only.
